# Supplementary material for: The Role of Peroxisome Proliferator-Activated Receptors and Their Transcriptional Coactivators Gene Variations in Human Trainability: A Systematic Review
Source: MDPI journal article supplement (doi:10.3390/ijms19051472), 2018-05-15
Supplement: s1 [file s1]

## Data extraction form

Reviewer.....Date.....

Author.....Journal.....

### Study method

Cross sectional

Intervention

GWAS

RCT

Other:

**Study aim:**.....

.....

### Participants

n =.....settings (age, height, weight,other):

population:

training program description:

### Genes data

SNPs:.....

### Intervention details

The load description .....

Duiration .....

**Fenotype values:**.....

Authors conclusions:

.....

.....

.....

.....

Reviewer decision:

.....

.....

.....
